# Supplementary material for: Microfluidic Synthesis and Purification of Magnetoliposomes for Potential Applications in the Gastrointestinal Delivery of Difficult-to-Transport Drugs
Source: MDPI journal article supplement (doi:10.3390/pharmaceutics14020315), 2022-01-28
Supplement: s1 [file s1]

# Supplementary Materials: Microfluidic Synthesis and Purification of Magnetoliposomes for Potential Applications in the Gastrointestinal Delivery of Difficult-to-Transport Drugs

Carlos E. Torres, Javier Cifuentes, Saúl C. Gómez, Valentina Quezada, Kevin A. Giraldo, Paola Ruiz Puentes, Laura Rueda-Gensini, Julian A. Serna, Carolina Muñoz-Camargo, Luis H. Reyes, Johann F. Osma and Juan C. Cruz

## Supplementary information

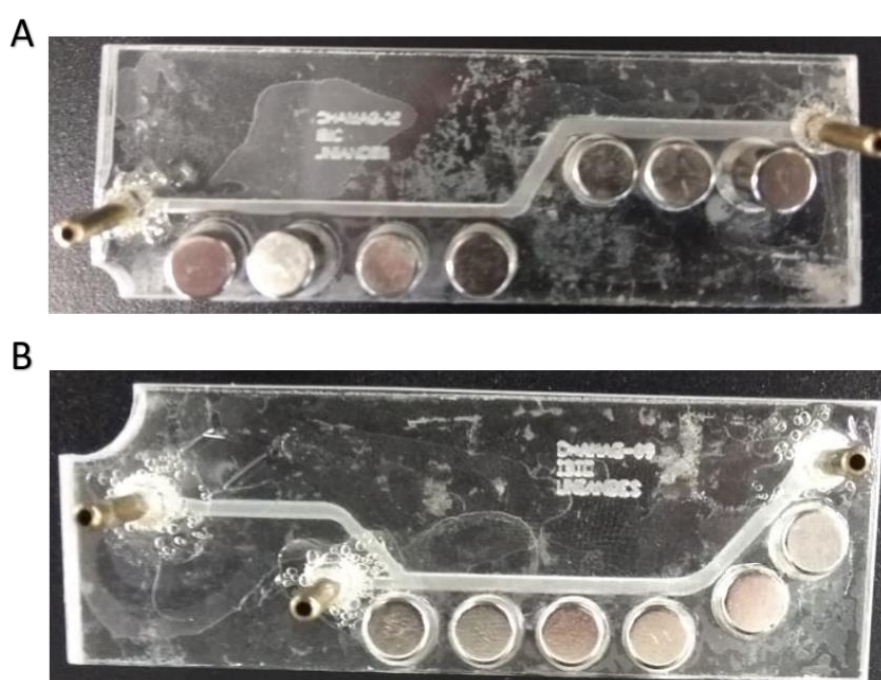

**Figure S1.** Manufactured separation Systems 1 and 2. (A) System 1 (B) System 2.

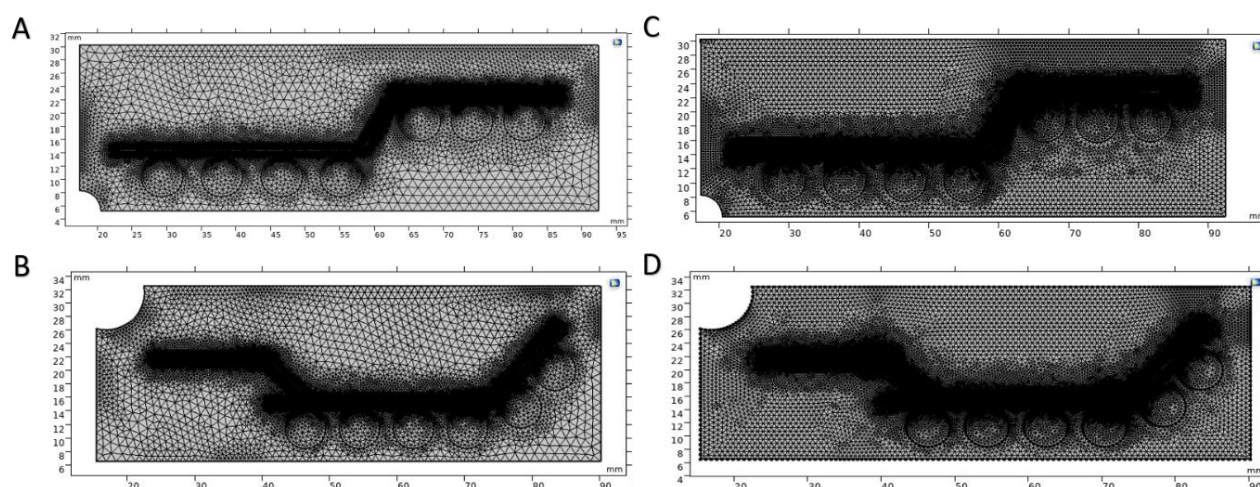

**Figure S2.** Meshing used for multiphysics simulations. (A) System 1 for particle tracing; (B) System 2 for particle tracing; (C) System 1 for mixture model; (D) System 2 for mixture model.

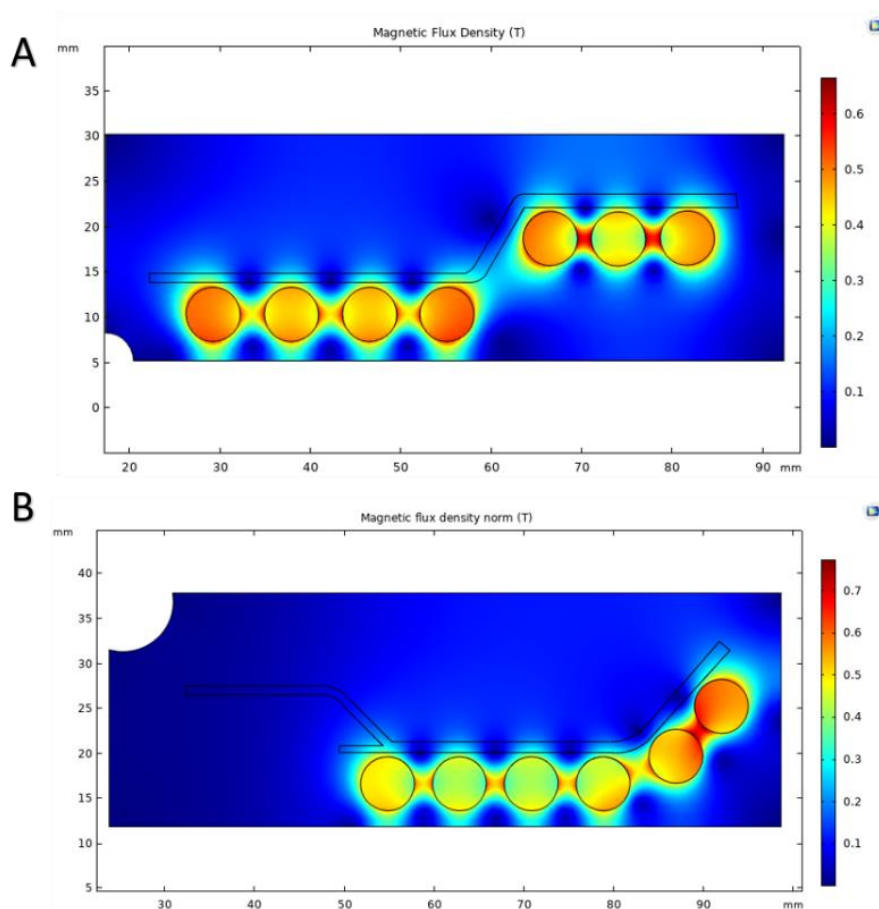

**Figure S3.** Magnetic flux density results for the separation Systems 1 and 2. (A) System 1 and (B) System 2.

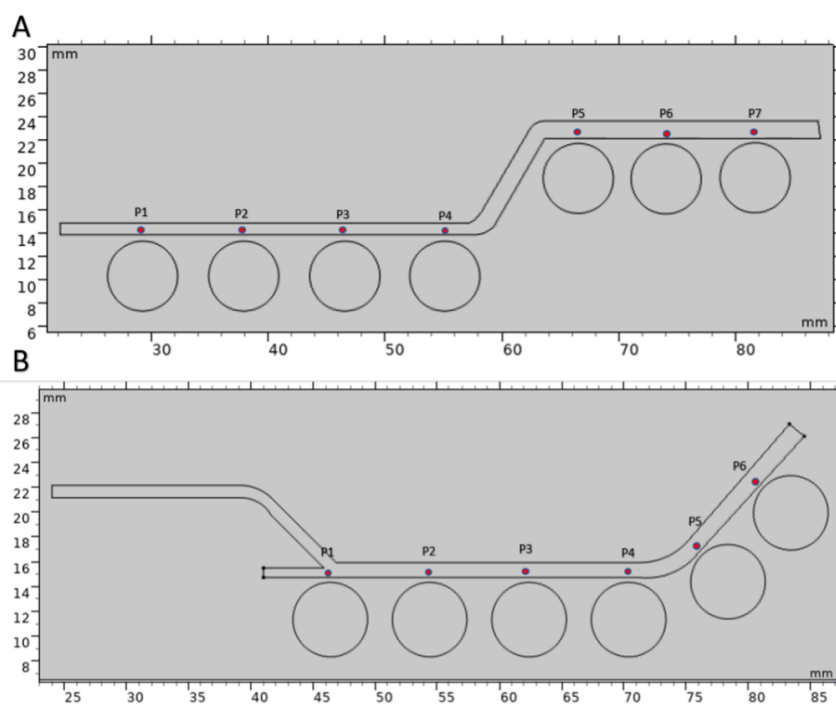

**Figure S4.** Evaluation points for mixture model simulations separation efficiency. (A) System 1 and (B) System 2.

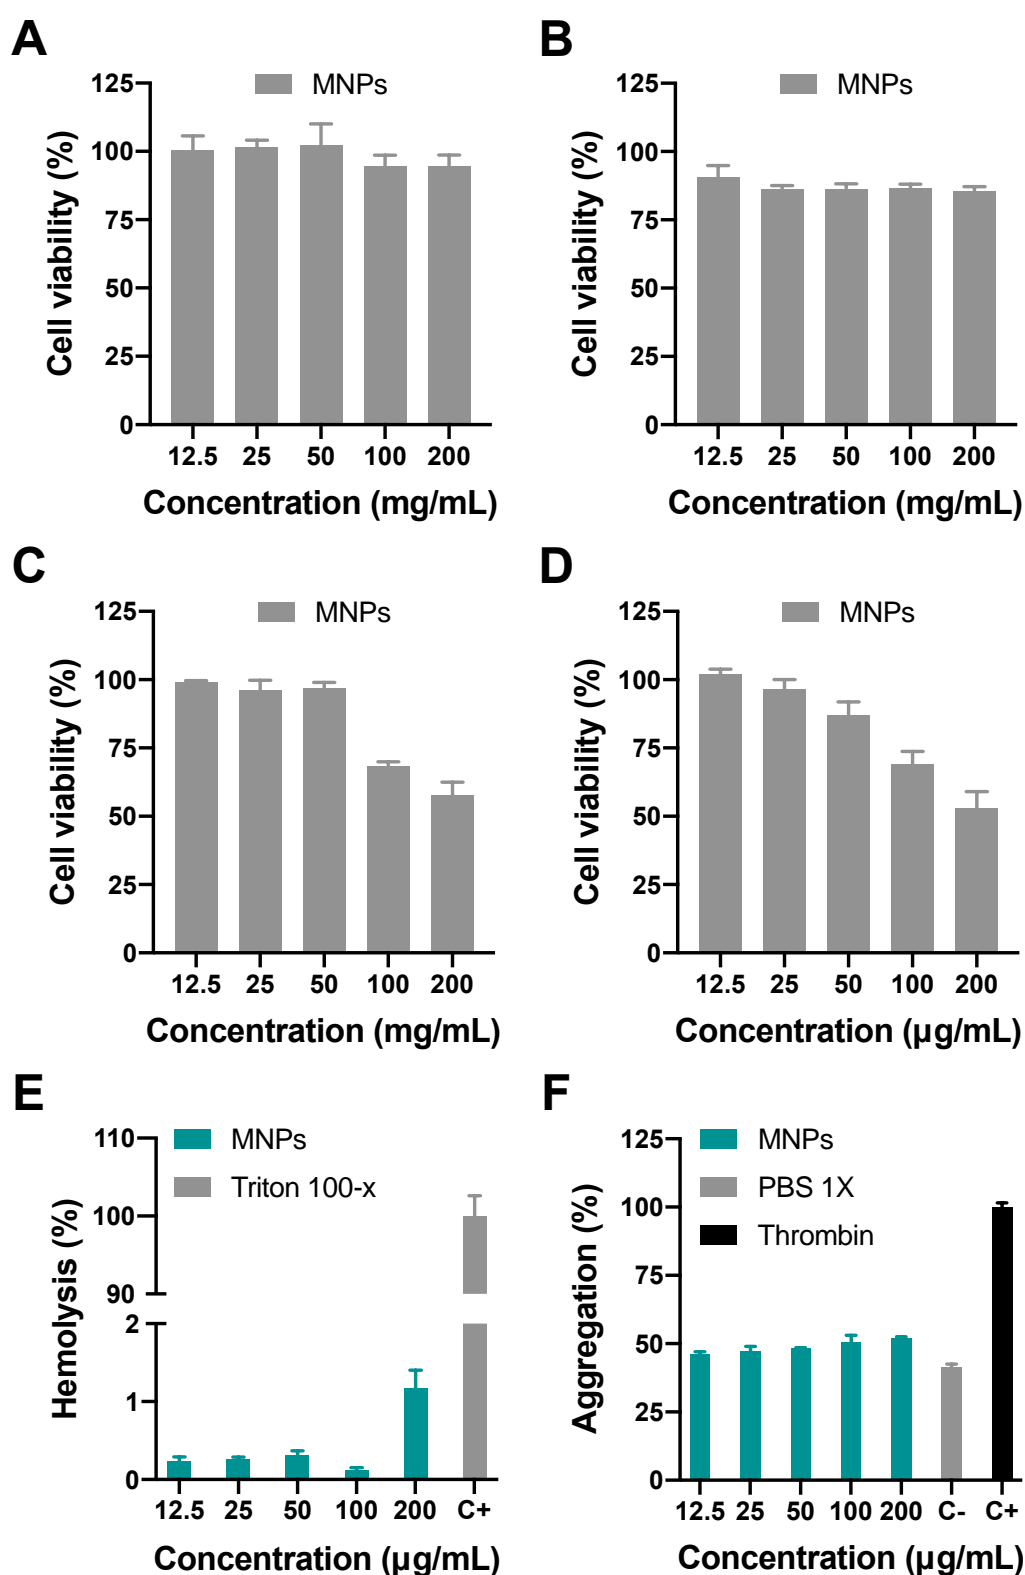

**Figure S5.** Biocompatibility assays for nanoconjugates (MNPs). Viability of Vero cells after 24 (A) and 48 h (B) of exposure. Viability of AGS cells after 24 (C) and 48 h (D) of exposure. (E) Hemolysis of MNPs with Triton X-100 as the positive control and PBS 1× as the negative control. (F) Platelet aggregation of nanoconjugates with PBS 1× as the negative control and thrombin as the positive one.
